# Supplementary material for: Novel NIR-II semiconducting molecule incorporating sorafenib for imaging guided synergetic cancer phototherapy and anti-angiogenic therapy
Source: Royal Society of Chemistry journal article supplement (doi:10.1039/d1tb00209k), 2021-01-01
Supplement: d1tb00209k1.pdf [file d1tb00209k1.pdf]

## Supporting Information

### Novel NIR-II semiconducting molecule incorporating sorafenib for imaging guided synergetic cancer phototherapy and anti-angiogenic therapy

Huihui Zou,<sup>a,c,1</sup> Zheng Wei,<sup>a,c,d,1</sup> Chuanhui Song,<sup>a,c</sup> Jianchuan Ran,<sup>a,c</sup> Zichen Cao,<sup>a,c</sup> Chuanchao Tang,<sup>a</sup>

Guorong Zhang,<sup>e</sup> Yu Cai,<sup>\*,b</sup> Mingxing Lu,<sup>\*,a</sup> Wei Han<sup>\*,a</sup>

<sup>a</sup> Department of Oral and Maxillofacial Surgery, Nanjing Stomatological Hospital, Medical School of Nanjing University, 30 Zhongyang Road, 210008, Nanjing, China.

<sup>b</sup> Clinical Research Institute, Zhejiang Provincial People's Hospital, People's Hospital of Hangzhou Medical College, No. 158 Shangtang Road, Hangzhou 310014, Zhejiang Province, P.R. China.

<sup>c</sup> Central Laboratory of Stomatology, Nanjing Stomatological Hospital, Medical School of Nanjing University, 30 Zhongyang Road, 210008, Nanjing, China

<sup>d</sup> Pediatric Dentistry, Nanjing Stomatology Hospital, Medical School of Nanjing University, No 30 Zhongyang Road, Nanjing, 210008, China

<sup>e</sup> Department of Orthodontics, Nanjing Stomatological Hospital, Medical School of Nanjing University, No 30 Zhongyang Road, Nanjing, 210008, China

E-mail: [iamycai@163.com](mailto:iamycai@163.com); [lmxnj@sina.com](mailto:lmxnj@sina.com); [doctorhanwei@hotmail.com](mailto:doctorhanwei@hotmail.com).

<sup>1</sup>These authors contributed equally.

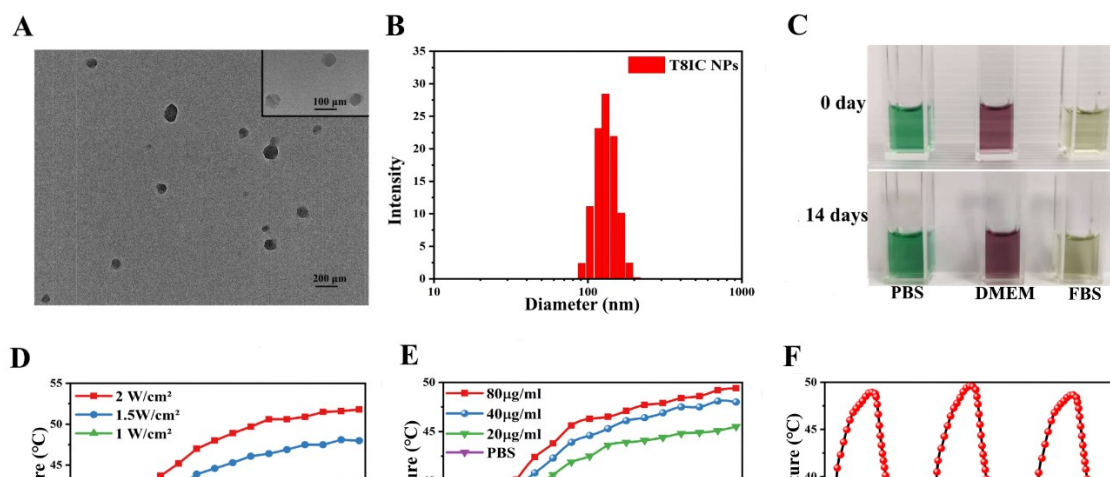

**Figure S1** Characterization and PTT properties of T8IC NPs. **A)** TEM image of T8IC NPs. **B)** DLS measurement of T8IC NPs in PBS. **C)** T8IC NPs dispersed in PBS, DMEM, and FBS standing for 0 days and 14 days. **D)** Photothermal heating curves of T8IC NPs with different laser power density (40  $\mu\text{g/mL}$ ). **E)** Photothermal of T8IC NPs at different concentrations in PBS. **F)** Stability of T8IC NPs with 3 cycles on-off laser irradiation.

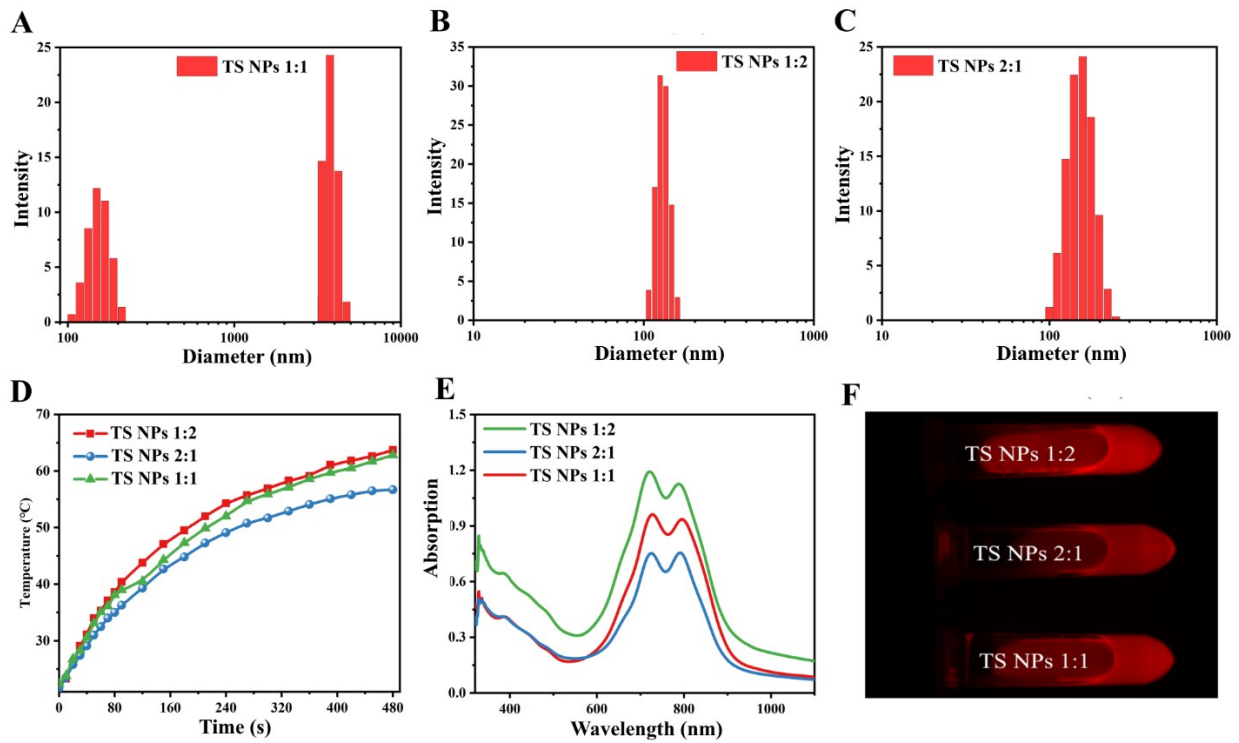

**Figure S2** Comparison of TS NPs at different ratio. **A)-C)** DLS results of TS NPs (T8IC : Sorafenib) at ratio of 1:1 (left), 1:2 (middle) and 2:1 (right). **D)** PTT of TS NPs at different ratios. **E)** UV-Vis-NIR absorption spectra of TS NPs. **F)** NIR-II images intensity of TS NPs solutions

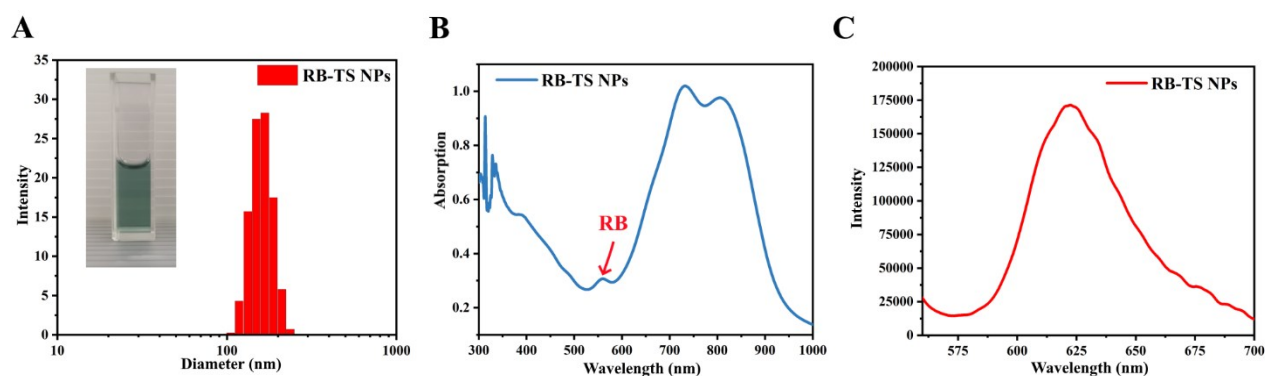

**Figure S3** Characterization of RB-TS NPs. **A)** DLS examination for the size of RB-TS NPs, photographs of RB-TS NPs distribution in PBS inserted. **B)** UV-Vis-NIR absorption spectra of RB-TS NPs. **C)** Fluorescence emission spectrum of RB-TS NPs in PBS.
